# Supplementary material for: Evolutionary history of phosphatidylinositol- 3-kinases: ancestral origin in eukaryotes and complex duplication patterns
Source: PubMed Central journal article supplement (PMC4617754; doi:10.1186/s12862-015-0498-7), 2015-10-19
Supplement: 12862_2015_498_MOESM1_ESM.pdf [file 12862_2015_498_MOESM1_ESM.pdf]

## Species as seeds for second Blast

| Catalytic dataset               | Regulatory datasets           |
|---------------------------------|-------------------------------|
| <i>Arabidopsis thaliana</i>     | <i>Apis mellifera</i>         |
| <i>Cryptococcus neoformans</i>  | <i>Capitella teleta</i>       |
| <i>Dictyostelium purpureum</i>  | <i>Lottia gigantea</i>        |
| <i>Ectocarpus siliculosus</i>   | <i>Nematostella vectensis</i> |
| <i>Emiliana huxleyi</i>         | <i>Trichoplax adhaerens</i>   |
| <i>Encephalitozoon cuniculi</i> |                               |
| <i>Entamoeba histolytica</i>    |                               |
| <i>Giardia intestinalis</i>     |                               |
| <i>Guillardia theta</i>         |                               |
| <i>Monosiga brevicollis</i>     |                               |
| <i>Naegleria gruberi</i>        |                               |
| <i>Ostreococcus lucimarinus</i> |                               |
| <i>Paramecium tetraurelia</i>   |                               |
| <i>Perkinsus marinus</i>        |                               |
| <i>Phytophthora infestans</i>   |                               |
| <i>Plasmodium falciparum</i>    |                               |
| <i>Rhizophagus irregularis</i>  |                               |
| <i>Thalassiosira pseudonana</i> |                               |
| <i>Trypanosoma brucei</i>       |                               |
| <i>Trypanosoma cruzi</i>        |                               |
