# Supplementary material for: Evolutionary history of phosphatidylinositol- 3-kinases: ancestral origin in eukaryotes and complex duplication patterns
Source: PubMed Central journal article supplement (PMC4617754; doi:10.1186/s12862-015-0498-7), 2015-10-19
Supplement: 12862_2015_498_MOESM2_ESM.pdf [file 12862_2015_498_MOESM2_ESM.pdf]

| Dataset                                            | Number of human paralogs | Figure number | Number of homologs | BMGE parameterer |                                            |                                   | Number of selected sites | Model selected by BIC | Alignment file name                           |
|----------------------------------------------------|--------------------------|---------------|--------------------|------------------|--------------------------------------------|-----------------------------------|--------------------------|-----------------------|-----------------------------------------------|
|                                                    |                          |               |                    | BLOSUM matrix    | Maximum gap rate allowed per character (%) | Minimum length of selected region |                          |                       |                                               |
| Eukaryotic selected homologs of catalytic subunits | 8                        | 1             | 139                | 30               | 50                                         | 2                                 | 398                      | UL3+G                 | Eukaryotic_catalytic_subunits_selection.fasta |
| Regulatory subunit class III                       | 1                        | 2             | 117                | 30               | 40                                         | 3                                 | 839                      | UL3+G                 | Regulatory_class_III.fasta                    |
| Regulatory class IA subunits                       | 3                        | 3             | 126                | 30               | 40                                         | 4                                 | 539                      | JTT+G                 | Regulatory_class_IA.fasta                     |
| Regulatory class IB subunits                       | 2                        | 4             | 67                 | 30               | 50                                         | 4                                 | 599                      | JTT+G                 | Regulatory_class_IB.fasta                     |
| Catalytic homologs total                           | 8                        | S1            | 1055               | 30               | 70                                         | 2                                 | 468                      | JTT+G                 | Eukaryotic_catalytic_subunits.fasta           |
| MIC class II catalytic subunits                    | 3                        | S3            | 108                | 30               | 40                                         | 4                                 | 1113                     | JTT+G                 | MIC_class_II_catalytic.fasta                  |
| MIC class I catalytic subunits                     | 4                        | S4            | 185                | 30               | 40                                         | 4                                 | 828                      | LG+G                  | MIC_class_I_catalytic.fasta                   |
