# Supplementary material for: Evolutionary history of phosphatidylinositol- 3-kinases: ancestral origin in eukaryotes and complex duplication patterns
Source: PubMed Central journal article supplement (PMC4617754; doi:10.1186/s12862-015-0498-7), 2015-10-19
Supplement: 12862_2015_498_MOESM3_ESM.pdf [file 12862_2015_498_MOESM3_ESM.pdf]

| Organism name and sequence ID            | Number of gaps (percentage) |
|------------------------------------------|-----------------------------|
| Homo sapiens ENSP00000418143             | 0 (0.0)                     |
| Homo sapiens ENSP00000392258             | 0 (0.0)                     |
| Phytophthora infestans 301122859         | 0 (0.0)                     |
| Trichomonas vaginalis 154414775          | 0 (0.0)                     |
| Dictyostelium purpureum 330806390        | 0 (0.0)                     |
| Dictyostelium purpureum 330795845        | 0 (0.0)                     |
| Acanthamoeba castellanii 470452549       | 0 (0.0)                     |
| Capsaspora owczarzaki 470309276          | 0 (0.0)                     |
| Drosophila melanogaster FBpp0083348      | 0 (0.0)                     |
| Paramecium tetraurelia 145531291         | 0 (0.0)                     |
| Tetrahymena thermophila 118379343        | 0 (0.0)                     |
| Homo sapiens ENSP00000263967             | 0 (0.0)                     |
| Entamoeba histolytica 67467388           | 0 (0.0)                     |
| Entamoeba histolytica 67471009           | 0 (0.0)                     |
| Oxytricha trifallax 403365406            | 0 (0.0)                     |
| Capsaspora owczarzaki 470303443          | 0 (0.0)                     |
| Nematostella vectensis 156221153         | 0 (0.0)                     |
| Entamoeba histolytica 67475484           | 0 (0.0)                     |
| Dictyostelium purpureum 330790467        | 0 (0.0)                     |
| Acanthamoeba castellanii 470490961       | 0 (0.0)                     |
| Tetrahymena thermophila 146164110        | 0 (0.0)                     |
| Salpingoeca rosetta 326430078            | 0 (0.0)                     |
| Paramecium tetraurelia 145517764         | 0 (0.0)                     |
| Dictyostelium purpureum 330841780        | 0 (0.0)                     |
| Paramecium tetraurelia 145535818         | 0 (0.0)                     |
| Phytophthora infestans 301112280         | 0 (0.0)                     |
| Phytophthora infestans 301112286         | 0 (0.0)                     |
| Capitella teleta 443734586               | 0 (0.0)                     |
| Capitella teleta 443701283               | 0 (0.0)                     |
| Fonticula alba H696-01050T0              | 0 (0.0)                     |
| Crassostrea gigas 405975190              | 0 (0.0)                     |
| Naegleria gruberi 290980695              | 0 (0.0)                     |
| Tetrahymena thermophila 118399676        | 0 (0.0)                     |
| Monosiga brevicollis 167521039           | 0 (0.0)                     |
| Acanthamoeba castellanii 470446361       | 0 (0.0)                     |
| Trichomonas vaginalis 154412871          | 0 (0.0)                     |
| Reticulomyxa filosa 569390586            | 1 (0.25)                    |
| Caenorhabditis elegans F39B1.1           | 1 (0.25)                    |
| Homo sapiens ENSP00000356155             | 1 (0.25)                    |
| Leishmania infantum 146081165            | 1 (0.25)                    |
| Homo sapiens ENSP00000265970             | 1 (0.25)                    |
| Nematostella vectensis 156225157         | 1 (0.25)                    |
| Dictyostelium purpureum 330802463        | 1 (0.25)                    |
| Trypanosoma cruzi 407833354              | 1 (0.25)                    |
| Entamoeba histolytica 183231243          | 1 (0.25)                    |
| Capsaspora owczarzaki 470291293          | 1 (0.25)                    |
| Drosophila melanogaster FBpp0075818      | 2 (0.5)                     |
| Caenorhabditis elegans B0334.8           | 2 (0.5)                     |
| Salpingoeca rosetta 326432665            | 2 (0.5)                     |
| Capsaspora owczarzaki 470306795          | 3 (0.75)                    |
| Oxytricha trifallax 403336721            | 4 (1.01)                    |
| Naegleria gruberi 290990903              | 7 (1.76)                    |
| Homo sapiens ENSP00000446444             | 8 (2.01)                    |
| Giardia intestinalis 559182176           | 10 (2.51)                   |
| Entamoeba histolytica 67483780           | 10 (2.51)                   |
| Monosiga brevicollis 167533638           | 11 (2.76)                   |
| Emiliana huxleyi 485633737               | 13 (3.27)                   |
| Acanthamoeba castellanii 470425472       | 13 (3.27)                   |
| Homo sapiens ENSP00000266497             | 14 (3.52)                   |
| Naegleria gruberi 290975002              | 15 (3.77)                   |
| Oxytricha trifallax 403359629            | 17 (4.27)                   |
| Crassostrea gigas 405975165              | 17 (4.27)                   |
| Acanthamoeba castellanii 470512532       | 19 (4.77)                   |
| Entamoeba histolytica 183232689          | 21 (5.28)                   |
| Acanthamoeba castellanii 470444588       | 21 (5.28)                   |
| Fonticula alba H696-02957T0              | 22 (5.53)                   |
| Batrachochytrium dendrobatidis 575486326 | 22 (5.53)                   |
| Dictyostelium purpureum 330806555        | 22 (5.53)                   |
| Phytophthora infestans 301103680         | 22 (5.53)                   |
| Toxoplasma gondii 237843183              | 22 (5.53)                   |

| Organism name and sequence ID         | Number of gaps (percentage) |
|---------------------------------------|-----------------------------|
| Salpingoeca rosetta 326432810         | 23 (5.78)                   |
| Caenorhabditis elegans B0025.1a       | 23 (5.78)                   |
| Emiliana huxleyi 485628976            | 23 (5.78)                   |
| Tetrahymena thermophila 118400017     | 23 (5.78)                   |
| Mucor circinelloides 511001770        | 23 (5.78)                   |
| Acanthamoeba castellanii 470412093    | 23 (5.78)                   |
| Paramecium tetraurelia 145541159      | 23 (5.78)                   |
| Physcomitrella patens 162685771       | 24 (6.03)                   |
| Arabidopsis thaliana 15219743         | 24 (6.03)                   |
| Crassostrea gigas 405952421           | 24 (6.03)                   |
| Rhizophagus irregularis 552917095     | 24 (6.03)                   |
| Capitella teleta 443710722            | 24 (6.03)                   |
| Nematostella vectensis 156224724      | 24 (6.03)                   |
| Homo sapiens ENSP00000262039          | 24 (6.03)                   |
| Saccharomyces cerevisiae YLR240W      | 24 (6.03)                   |
| Capsaspora owczarzaki 470321313       | 24 (6.03)                   |
| Mortierella verticillata MVEG-00850T0 | 24 (6.03)                   |
| Drosophila melanogaster FBpp0071973   | 24 (6.03)                   |
| Selaginella moellendorffii 300148168  | 25 (6.28)                   |
| Leishmania infantum 339898452         | 25 (6.28)                   |
| Plasmodium falciparum 124506225       | 25 (6.28)                   |
| Cryptosporidium parvum 66475452       | 25 (6.28)                   |
| Entamoeba histolytica 67483313        | 26 (6.53)                   |
| Selaginella moellendorffii 300148666  | 26 (6.53)                   |
| Trypanosoma cruzi 407860885           | 26 (6.53)                   |
| Cryptococcus neoformans 540393534     | 26 (6.53)                   |
| Nannochloropsis gaditana 585106701    | 27 (6.78)                   |
| Naegleria gruberi 290989255           | 27 (6.78)                   |
| Spironucleus salmonicida 558601893    | 28 (7.04)                   |
| Dictyostelium purpureum 330792962     | 29 (7.29)                   |
| Acanthamoeba castellanii 470467087    | 30 (7.54)                   |
| Phytophthora infestans 301100996      | 31 (7.79)                   |
| Ectocarpus siliculosus 299472549      | 32 (8.04)                   |
| Crassostrea gigas 405975626           | 33 (8.29)                   |
| Ectocarpus siliculosus 298705307      | 38 (9.55)                   |
| Dictyostelium purpureum 330842718     | 44 (11.06)                  |
| Reticulomyxa filosa 569374282         | 47 (11.81)                  |
| Mortierella verticillata MVEG-08250T0 | 48 (12.06)                  |
| Homo sapiens ENSP00000458238          | 49 (12.31)                  |
| Guillardia theta 428168346            | 49 (12.31)                  |
| Arabidopsis thaliana 30694536         | 50 (12.56)                  |
| Leishmania infantum 146093129         | 51 (12.81)                  |
| Tetrahymena thermophila 118351905     | 51 (12.81)                  |
| Salpingoeca rosetta 326427845         | 52 (13.07)                  |
| Naegleria gruberi 290999046           | 57 (14.32)                  |
| Naegleria gruberi 291000178           | 57 (14.32)                  |
| Ostreococcus lucimarinus 145344789    | 62 (15.58)                  |
| Monosiga brevicollis 167516396        | 64 (16.08)                  |
| Capitella teleta 443696965            | 64 (16.08)                  |
| Naegleria gruberi 290995492           | 68 (17.09)                  |
| Thalassiosira pseudonana 220971372    | 68 (17.09)                  |
| Chlamydomonas reinhardtii 2109289     | 69 (17.34)                  |
| Volvox carteri 302844923              | 69 (17.34)                  |
| Dictyostelium purpureum 330846412     | 77 (19.35)                  |
| Saccharomyces cerevisiae YNL267W      | 80 (20.1)                   |
| Mortierella verticillata MVEG-09379T0 | 84 (21.11)                  |
| Salpingoeca rosetta 326435514         | 85 (21.36)                  |
| Tetrahymena thermophila 146174543     | 86 (21.61)                  |
| Arabidopsis thaliana 15237610         | 88 (22.11)                  |
| Leishmania infantum 146099611         | 88 (22.11)                  |
| Monosiga brevicollis 167537642        | 88 (22.11)                  |
| Selaginella moellendorffii 300153477  | 88 (22.11)                  |
| Homo sapiens ENSP00000357869          | 89 (22.36)                  |
| Salpingoeca rosetta 326435786         | 89 (22.36)                  |
| Saccharomyces cerevisiae YLR305C      | 91 (22.86)                  |
| Nannochloropsis gaditana 585108648    | 148 (37.19)                 |
| Monosiga brevicollis 167520105        | 179 (44.97)                 |
| Thalassiosira pseudonana 220968505    | 204 (51.26)                 |
| Monosiga brevicollis 167520402        | 215 (54.02)                 |
