# Supplementary material for: Evolutionary history of phosphatidylinositol- 3-kinases: ancestral origin in eukaryotes and complex duplication patterns
Source: PubMed Central journal article supplement (PMC4617754; doi:10.1186/s12862-015-0498-7), 2015-10-19
Supplement: 12862_2015_498_MOESM4_ESM.pdf [file 12862_2015_498_MOESM4_ESM.pdf]

| Organism name and sequence ID               | Number of gaps (percentage) |
|---------------------------------------------|-----------------------------|
| Spizellomyces punctatus SPPG-07143T0        | 0 (0.0)                     |
| Danio rerio ENSDARP00000079663              | 0 (0.0)                     |
| Gasterosteus aculeatus ENSGACP00000003905   | 0 (0.0)                     |
| Takifugu rubripes ENSTRUP00000030991        | 0 (0.0)                     |
| Tetraodon nigroviridis ENSTNIP00000005287   | 0 (0.0)                     |
| Xiphophorus maculatus ENSXMAP00000000846    | 0 (0.0)                     |
| Latimeria chalumnae ENSLACP00000011766      | 0 (0.0)                     |
| Drosophila melanogaster FBpp0081466         | 0 (0.0)                     |
| Callorhinchus milii 632945103               | 0 (0.0)                     |
| Branchiostoma floridae 260782301            | 0 (0.0)                     |
| Capitella teleta 443696776                  | 0 (0.0)                     |
| Apis mellifera 571508548                    | 0 (0.0)                     |
| Thecamonas trahens AMMSG-05614T0            | 0 (0.0)                     |
| Batrachochytrium dendrobatidis 575474224    | 0 (0.0)                     |
| Crassostrea gigas 405975645                 | 0 (0.0)                     |
| Lottia gigantea 556094991                   | 0 (0.0)                     |
| Saprolegnia diclina 530726775               | 0 (0.0)                     |
| Aphanomyces astaci 574103097                | 0 (0.0)                     |
| Canis lupus ENSCAFP00000009079              | 0 (0.0)                     |
| Ornithorhynchus anatinus ENSOANP00000010793 | 0 (0.0)                     |
| Bos taurus ENSBTAP00000027702               | 0 (0.0)                     |
| Pteropus vampyrus ENSPVAP00000006447        | 0 (0.0)                     |
| Homo sapiens ENSP00000349205                | 0 (0.0)                     |
| Otolemur garnettii ENSOGAP00000007000       | 0 (0.0)                     |
| Mus musculus ENSMUSP000000067400            | 0 (0.0)                     |
| Pelodiscus sinensis ENSPSIP00000002713      | 0 (0.0)                     |
| Anas platyrhynchos ENSAPLP00000010174       | 0 (0.0)                     |
| Ficedula albicollis ENSFALP00000013105      | 0 (0.0)                     |
| Taeniopygia guttata ENSTGUP00000004192      | 0 (0.0)                     |
| Xenopus tropicalis ENSXETP00000004982       | 0 (0.0)                     |
| Lepisosteus oculatus ENSLOCP00000001871     | 0 (0.0)                     |
| Oreochromis niloticus ENSONIP00000002550    | 1 (0.12)                    |
| Gadus morhua ENSGMOP00000003697             | 1 (0.12)                    |
| Ciona intestinalis ENSCINP00000005460       | 1 (0.12)                    |
| Nematostella vectensis 156218743            | 1 (0.12)                    |
| Aphanomyces invadans 574480269              | 1 (0.12)                    |
| Mucor circinelloides 511009779              | 2 (0.24)                    |
| Trichophyton rubrum 326460079               | 4 (0.48)                    |
| Aspergillus oryzae 83768900                 | 4 (0.48)                    |
| Capsaspora owczarzaki 470304578             | 4 (0.48)                    |
| Coccidioides posadasii 303313395            | 4 (0.48)                    |
| Cryptococcus neoformans 540382592           | 5 (0.6)                     |
| Allomyces macrogynus AMAG-02895T0           | 6 (0.72)                    |
| Cryptococcus gattii 321264011               | 6 (0.72)                    |
| Helobdella robusta 555689993                | 6 (0.72)                    |
| Dictyostelium purpureum 330802485           | 7 (0.83)                    |
| Magnaporthe oryzae 389628626                | 7 (0.83)                    |
| Phaeodactylum tricornutum 219127594         | 7 (0.83)                    |
| Candida tropicalis 255727190                | 7 (0.83)                    |
| Phytophthora parasitica 568103383           | 9 (1.07)                    |
| Phytophthora infestans 301091919            | 9 (1.07)                    |
| Echinococcus granulosus 556521595           | 9 (1.07)                    |
| Blumeria graminis 521771122                 | 9 (1.07)                    |
| Naegleria gruberi 291000750                 | 9 (1.07)                    |
| Dictyostelium fasciculatum 470251580        | 10 (1.19)                   |
| Clonorchis sinensis 358341839               | 12 (1.43)                   |
| Fragaria vesca 470141421                    | 13 (1.55)                   |
| Aplysia californica 524910995               | 14 (1.67)                   |
| Zea mays 413939320                          | 14 (1.67)                   |

| Organism name and sequence ID            | Number of gaps (percentage) |
|------------------------------------------|-----------------------------|
| Physcomitrella patens 162680728          | 15 (1.79)                   |
| Selaginella moellendorffii 300154027     | 15 (1.79)                   |
| Eutrema salsugineum 557114017            | 15 (1.79)                   |
| Arabidopsis thaliana 15233564            | 15 (1.79)                   |
| Ostreococcus lucimarinus 145345011       | 16 (1.91)                   |
| Entamoeba histolytica 67473216           | 16 (1.91)                   |
| Entamoeba nuttalli 407036927             | 16 (1.91)                   |
| Monodelphis domestica ENSMODP00000015056 | 16 (1.91)                   |
| Acanthamoeba castellanii 470509949       | 17 (2.03)                   |
| Caenorhabditis elegans ZK930.1a          | 19 (2.26)                   |
| Triticum urartu 474434175                | 19 (2.26)                   |
| Micromonas pusilla 303271833             | 25 (2.98)                   |
| Leishmania braziliensis 154340533        | 26 (3.1)                    |
| Mortierella verticillata MVEG-06780T0    | 29 (3.46)                   |
| Thalassiosira pseudonana 220976169       | 30 (3.58)                   |
| Fonticula alba H696-01790T0              | 33 (3.93)                   |
| Chlorella variabilis 552825556           | 33 (3.93)                   |
| Monosiga brevicollis 167534887           | 36 (4.29)                   |
| Populus trichocarpa 550336423            | 37 (4.41)                   |
| Schistosoma mansoni 360043138            | 47 (5.6)                    |
| Saccharomyces cerevisiae YBR097W         | 50 (5.96)                   |
| Meleagris gallopavo ENSMGAP00000011917   | 51 (6.08)                   |
| Trypanosoma cruzi 407853206              | 54 (6.44)                   |
| Anolis carolinensis ENSACAP00000002347   | 59 (7.03)                   |
| Trypanosoma brucei 261334915             | 60 (7.15)                   |
| Tupaia belangeri ENSTBEP00000007529      | 64 (7.63)                   |
| Salpingoeca rosetta 326435714            | 69 (8.22)                   |
| Hydra vulgaris 449665199                 | 72 (8.58)                   |
| Leishmania major 157871818               | 76 (9.06)                   |
| Leishmania infantum 146092133            | 76 (9.06)                   |
| Oxytricha trifallax 403376447            | 76 (9.06)                   |
| Leishmania donovani 398018212            | 76 (9.06)                   |
| Leishmania mexicana 401425064            | 76 (9.06)                   |
| Coccomyxa subellipsoidea 545368922       | 87 (10.37)                  |
| Loxodonta africana XP003420965           | 116 (13.83)                 |
| Ciona savignyi ENSCSAVP00000012067       | 124 (14.78)                 |
| Trichoplax adhaerens 196007140           | 127 (15.14)                 |
| Emiliana huxleyi 485639671               | 136 (16.21)                 |
| Astyanax mexicanus ENSAMXP00000015738    | 171 (20.38)                 |
| Saccoglossus kowalevskii 585653380       | 175 (20.86)                 |
| Ajellomyces capsulatus 154286454         | 175 (20.86)                 |
| Polysphondylium pallidum 281212562       | 179 (21.33)                 |
| Volvox carteri 302832507                 | 183 (21.81)                 |
| Ectocarpus siliculosus 299117051         | 214 (25.51)                 |
| Rhizophagus irregularis 552925951        | 235 (28.01)                 |
| Erinaceus europaeus ENSEEUP00000007843   | 253 (30.15)                 |
| Gallus gallus ENSGALP00000036848         | 267 (31.82)                 |
| Rhizopus delemar 384495285               | 374 (44.58)                 |
| Erinaceus europaeus ENSEEUP00000002071   | 400 (47.68)                 |
| Blastocystis hominis 300176769           | 432 (51.49)                 |
| Reticulomyxa filosa 569406653            | 481 (57.33)                 |
| Petromyzon marinus ENSPMAP00000004074    | 534 (63.65)                 |
| Oryza sativa 115449223                   | 588 (70.08)                 |
| Oryzias latipes ENSORLP00000025786       | 595 (70.92)                 |
| Guillardia theta 428179745               | 599 (71.39)                 |
| Thalassiosira oceanica 397603733         | 600 (71.51)                 |
| Sphaeroforma arctica SARC-12932T0        | 612 (72.94)                 |
| Trypanosoma vivax 343420766              | 672 (80.1)                  |
