# Supplementary material for: Evolutionary history of phosphatidylinositol- 3-kinases: ancestral origin in eukaryotes and complex duplication patterns
Source: PubMed Central journal article supplement (PMC4617754; doi:10.1186/s12862-015-0498-7), 2015-10-19
Supplement: 12862_2015_498_MOESM5_ESM.pdf [file 12862_2015_498_MOESM5_ESM.pdf]

| Organism name and sequence ID               | Number of gaps (percentage) |
|---------------------------------------------|-----------------------------|
| Callorhinchus milii 632962079               | 0 (0.0)                     |
| Xiphophorus maculatus ENSXMAP00000018652    | 0 (0.0)                     |
| Gasterosteus aculeatus ENSGACP00000020881   | 0 (0.0)                     |
| Takifugu rubripes ENSTRUP00000018795        | 0 (0.0)                     |
| Oreochromis niloticus ENSONIP00000013929    | 0 (0.0)                     |
| Takifugu rubripes ENSTRUP00000027603        | 0 (0.0)                     |
| Oryzias latipes ENSORLP00000021829          | 0 (0.0)                     |
| Danio rerio ENSDARP00000056212              | 0 (0.0)                     |
| Astyanax mexicanus ENSAMXP00000012290       | 0 (0.0)                     |
| Lepisosteus oculatus ENSLOCP00000012884     | 0 (0.0)                     |
| Ficedula albicollis ENSFALP00000009923      | 0 (0.0)                     |
| Anas platyrhynchos ENSAPLP00000006492       | 0 (0.0)                     |
| Meleagris gallopavo ENSMGAP00000011022      | 0 (0.0)                     |
| Gallus gallus ENSGALP00000023820            | 0 (0.0)                     |
| Lepisosteus oculatus ENSLOCP00000006953     | 0 (0.0)                     |
| Chrysemys picta 530627063                   | 1 (0.19)                    |
| Callorhinchus milii 632963753               | 1 (0.19)                    |
| Oreochromis niloticus ENSONIP00000002191    | 1 (0.19)                    |
| Xiphophorus maculatus ENSXMAP00000015169    | 1 (0.19)                    |
| Tetraodon nigroviridis ENSTNIP00000022063   | 1 (0.19)                    |
| Gasterosteus aculeatus ENSGACP00000001371   | 1 (0.19)                    |
| Lepisosteus oculatus ENSLOCP00000001757     | 1 (0.19)                    |
| Otolemur garnettii ENSOGAP00000001020       | 1 (0.19)                    |
| Monodelphis domestica ENSMOP00000024566     | 2 (0.37)                    |
| Taeniopygia guttata ENSTGUP00000003114      | 2 (0.37)                    |
| Chrysemys picta 530622965                   | 2 (0.37)                    |
| Ficedula albicollis ENSFALP00000010272      | 2 (0.37)                    |
| Gallus gallus ENSGALP00000023822            | 2 (0.37)                    |
| Pelodiscus sinensis ENSPSIP00000011890      | 2 (0.37)                    |
| Anolis carolinensis ENSACAP00000016070      | 2 (0.37)                    |
| Latimeria chalumnae ENSLACP00000015476      | 2 (0.37)                    |
| Homo sapiens ENSP00000274335                | 2 (0.37)                    |
| Gadus morhua ENSGMOP00000017031             | 2 (0.37)                    |
| Bos taurus ENSBTAP00000014594               | 2 (0.37)                    |
| Loxodonta africana ENSLAFP00000015303       | 2 (0.37)                    |
| Danio rerio ENSDARP00000056821              | 2 (0.37)                    |
| Oreochromis niloticus ENSONIP00000013171    | 2 (0.37)                    |
| Takifugu rubripes ENSTRUP00000026411        | 2 (0.37)                    |
| Pteropus vampyrus ENSPVAP00000007375        | 2 (0.37)                    |
| Gallus gallus ENSGALP00000005414            | 2 (0.37)                    |
| Ficedula albicollis ENSFALP00000014443      | 2 (0.37)                    |
| Canis lupus ENSCAFP00000011322              | 2 (0.37)                    |
| Mus musculus ENSMUSP00000056774             | 2 (0.37)                    |
| Tupaia belangeri ENSTBEP00000012016         | 3 (0.56)                    |
| Xenopus tropicalis ENSXETP00000046442       | 3 (0.56)                    |
| Oryzias latipes ENSORLP00000003326          | 3 (0.56)                    |
| Tetraodon nigroviridis ENSTNIP00000014006   | 3 (0.56)                    |
| Anas platyrhynchos ENSAPLP00000011511       | 3 (0.56)                    |
| Anas platyrhynchos ENSAPLP00000004356       | 4 (0.74)                    |
| Gadus morhua ENSGMOP00000003534             | 4 (0.74)                    |
| Gadus morhua ENSGMOP00000010892             | 5 (0.93)                    |
| Xiphophorus maculatus ENSXMAP00000013925    | 5 (0.93)                    |
| Ornithorhynchus anatinus ENSOANP00000002083 | 6 (1.11)                    |
| Monodelphis domestica ENSMOP00000002126     | 6 (1.11)                    |
| Mus musculus ENSMUSP00000034296             | 6 (1.11)                    |
| Homo sapiens ENSP00000222254                | 6 (1.11)                    |
| Loxodonta africana ENSLAFP00000000599       | 6 (1.11)                    |
| Canis lupus ENSCAFP00000022072              | 6 (1.11)                    |
| Taeniopygia guttata ENSTGUP00000008408      | 6 (1.11)                    |
| Saccoglossus kowalevskii 585680651          | 7 (1.3)                     |
| Pteropus vampyrus ENSPVAP00000001922        | 8 (1.48)                    |
| Bos taurus ENSBTAP00000003033               | 8 (1.48)                    |
| Branchiostoma floridae 260823974            | 9 (1.67)                    |

| Organism name and sequence ID               | Number of gaps (percentage) |
|---------------------------------------------|-----------------------------|
| Xenopus tropicalis ENSXETP00000028313       | 9 (1.67)                    |
| Apis mellifera 66500538                     | 10 (1.86)                   |
| Gasterosteus aculeatus ENSGACP00000020473   | 11 (2.04)                   |
| Taeniopygia guttata ENSTGUP00000000409      | 14 (2.6)                    |
| Crassostrea gigas 405968860                 | 34 (6.31)                   |
| Capitella teleta 443694211                  | 34 (6.31)                   |
| Amphimedon queenslandica 340378846          | 36 (6.68)                   |
| Otolemur garnettii ENSOGAP00000013371       | 57 (10.58)                  |
| Salpingoeca rosetta 326427517               | 63 (11.69)                  |
| Meleagris gallopavo ENSMGAP00000004955      | 74 (13.73)                  |
| Oreochromis niloticus ENSONIP00000023417    | 101 (18.74)                 |
| Erinaceus europaeus ENSEEUP00000007255      | 115 (21.34)                 |
| Petromyzon marinus ENSPMAT00000003687       | 121 (22.45)                 |
| Oryzias latipes ENSORLP00000013359          | 121 (22.45)                 |
| Gasterosteus aculeatus ENSGACP00000006864   | 122 (22.63)                 |
| Oreochromis niloticus ENSONIP00000009899    | 122 (22.63)                 |
| Oryzias latipes ENSORLP00000016725          | 122 (22.63)                 |
| Ornithorhynchus anatinus ENSOANP00000009424 | 124 (23.01)                 |
| Xenopus tropicalis ENSXETP00000007065       | 124 (23.01)                 |
| Anolis carolinensis ENSACAP00000015633      | 124 (23.01)                 |
| Bos taurus ENSBTAP00000003878               | 124 (23.01)                 |
| Loxodonta africana ENSLAFP00000003074       | 124 (23.01)                 |
| Homo sapiens ENSP00000361075                | 124 (23.01)                 |
| Canis lupus ENSCAFP00000006438              | 124 (23.01)                 |
| Mus musculus ENSMUSP00000030464             | 124 (23.01)                 |
| Gadus morhua ENSGMOP00000000809             | 124 (23.01)                 |
| Xiphophorus maculatus ENSXMAP00000018429    | 124 (23.01)                 |
| Amphimedon queenslandica 340375770          | 125 (23.19)                 |
| Tupaia belangeri ENSTBEP00000007253         | 125 (23.19)                 |
| Pteropus vampyrus ENSPVAP00000012903        | 125 (23.19)                 |
| Gasterosteus aculeatus ENSGACP00000021319   | 125 (23.19)                 |
| Danio rerio ENSDARP00000040333              | 127 (23.56)                 |
| Gadus morhua ENSGMOP00000012642             | 127 (23.56)                 |
| Tetraodon nigroviridis ENSTNIP00000009742   | 133 (24.68)                 |
| Takifugu rubripes ENSTRUP00000030226        | 133 (24.68)                 |
| Pelodiscus sinensis ENSPSIP00000012953      | 137 (25.42)                 |
| Erinaceus europaeus ENSEEUP00000008939      | 143 (26.53)                 |
| Takifugu rubripes ENSTRUP00000000305        | 143 (26.53)                 |
| Otolemur garnettii ENSOGAP00000005767       | 146 (27.09)                 |
| Drosophila melanogaster FBpp0303632         | 151 (28.01)                 |
| Xiphophorus maculatus ENSXMAP00000005400    | 151 (28.01)                 |
| Tetraodon nigroviridis ENSTNIP00000013096   | 159 (29.5)                  |
| Takifugu rubripes ENSTRUP00000017331        | 159 (29.5)                  |
| Xiphophorus maculatus ENSXMAP00000002496    | 160 (29.68)                 |
| Oreochromis niloticus ENSONIP00000015985    | 160 (29.68)                 |
| Aplysia californica 524870249               | 161 (29.87)                 |
| Gasterosteus aculeatus ENSGACP00000010853   | 162 (30.06)                 |
| Latimeria chalumnae ENSLACP00000008684      | 165 (30.61)                 |
| Lottia gigantea 556112584                   | 168 (31.17)                 |
| Caenorhabditis elegans Y110A7A.10           | 181 (33.58)                 |
| Erinaceus europaeus ENSEEUP00000002251      | 186 (34.51)                 |
| Danio rerio ENSDARP000000106632             | 258 (47.87)                 |
| Nematostella vectensis 156227304            | 301 (55.84)                 |
| Astyanax mexicanus ENSAMXP00000020188       | 308 (57.14)                 |
| Astyanax mexicanus ENSAMXP00000003118       | 368 (68.27)                 |
| Lottia gigantea 556112583                   | 385 (71.43)                 |
| Ciona intestinalis ENSCINP00000024453       | 390 (72.36)                 |
| Tetraodon nigroviridis ENSTNIP00000022692   | 391 (72.54)                 |
| Capsaspora owczarzaki 470298756             | 396 (73.47)                 |
| Amphimedon queenslandica 340373849          | 397 (73.65)                 |
| Hydra vulgaris 449671265                    | 399 (74.03)                 |
| Trichoplax adhaerens 196000346              | 401 (74.4)                  |
| Monosiga brevicollis 167520620              | 450 (83.49)                 |
