# Supplementary material for: Evolutionary history of phosphatidylinositol- 3-kinases: ancestral origin in eukaryotes and complex duplication patterns
Source: PubMed Central journal article supplement (PMC4617754; doi:10.1186/s12862-015-0498-7), 2015-10-19
Supplement: 12862_2015_498_MOESM6_ESM.pdf [file 12862_2015_498_MOESM6_ESM.pdf]

| Organism name and sequence ID             | Number of gaps (percentage) |
|-------------------------------------------|-----------------------------|
| Pteropus vampyrus ENSPVAP00000009486      | 0 (0.0)                     |
| Monodelphis domestica ENSMODP00000010607  | 0 (0.0)                     |
| Canis lupus ENSCAFP00000025622            | 0 (0.0)                     |
| Oreochromis niloticus ENSONIP00000022874  | 0 (0.0)                     |
| Takifugu rubripes ENSTRUP00000009990      | 0 (0.0)                     |
| Danio rerio ENSDARP00000110608            | 0 (0.0)                     |
| Astyanax mexicanus ENSAMXP00000009979     | 0 (0.0)                     |
| Gasterosteus aculeatus ENSGACP00000009090 | 0 (0.0)                     |
| Lepisosteus oculatus ENSLOCP00000016346   | 0 (0.0)                     |
| Loxodonta africana ENSLAFP00000014379     | 0 (0.0)                     |
| Mus musculus ENSMUSP00000021283           | 0 (0.0)                     |
| Chrysemys picta 530646583                 | 0 (0.0)                     |
| Otolemur garnettii ENSOGAP00000006947     | 0 (0.0)                     |
| Homo sapiens ENSP00000392812              | 0 (0.0)                     |
| Ficedula albicollis ENSFALP00000009800    | 1 (0.17)                    |
| Gallus gallus NP001025868                 | 1 (0.17)                    |
| Anas platyrhynchos ENSAPLP00000015962     | 1 (0.17)                    |
| Xiphophorus maculatus ENSXMAP00000006631  | 1 (0.17)                    |
| Gasterosteus aculeatus ENSGACP00000025604 | 1 (0.17)                    |
| Xiphophorus maculatus ENSXMAP00000014544  | 1 (0.17)                    |
| Bos taurus ENSBTAP000000055710            | 1 (0.17)                    |
| Oryzias latipes ENSORLP00000019168        | 1 (0.17)                    |
| Anolis carolinensis ENSACAP00000017428    | 2 (0.33)                    |
| Pelodiscus sinensis ENSPSIP00000009891    | 3 (0.5)                     |
| Oryzias latipes ENSORLP00000003891        | 4 (0.67)                    |
| Callorhynchus milii 632942859             | 4 (0.67)                    |
| Meleagris gallopavo ENSMGAP00000002675    | 5 (0.83)                    |
| Xenopus tropicalis ENSXETP00000042245     | 5 (0.83)                    |
| Gadus morhua ENSGMOP00000019203           | 5 (0.83)                    |
| Oreochromis niloticus ENSONIP00000010381  | 12 (2.0)                    |
| Petromyzon marinus ENSPMAP00000000327     | 16 (2.67)                   |
| Danio rerio ENSDARP00000111599            | 44 (7.35)                   |
| Otolemur garnettii ENSOGAP00000006938     | 44 (7.35)                   |
| Xenopus tropicalis ENSXETP00000042238     | 45 (7.51)                   |

| Organism name and sequence ID             | Number of gaps (percentage) |
|-------------------------------------------|-----------------------------|
| Anas platyrhynchos ENSAPLP00000015850     | 45 (7.51)                   |
| Lepisosteus oculatus ENSLOCP00000016321   | 47 (7.85)                   |
| Canis lupus ENSCAFP00000025610            | 47 (7.85)                   |
| Erinaceus europaeus ENSEEUP00000002256    | 47 (7.85)                   |
| Homo sapiens ENSP00000475670              | 47 (7.85)                   |
| Meleagris gallopavo ENSMGAP00000002634    | 47 (7.85)                   |
| Anolis carolinensis ENSACAP00000017414    | 48 (8.01)                   |
| Pelodiscus sinensis ENSPSIP00000012541    | 48 (8.01)                   |
| Pteropus vampyrus ENSPVAP00000009482      | 49 (8.18)                   |
| Gallus gallus ENSGALP00000001859          | 49 (8.18)                   |
| Danio rerio ENSDARP00000109865            | 50 (8.35)                   |
| Mus musculus ENSMUSP00000052522           | 50 (8.35)                   |
| Xiphophorus maculatus ENSXMAP00000006614  | 51 (8.51)                   |
| Callorhynchus milii 632942857             | 51 (8.51)                   |
| Oreochromis niloticus ENSONIP00000022879  | 52 (8.68)                   |
| Astyanax mexicanus ENSAMXP00000009984     | 52 (8.68)                   |
| Oryzias latipes ENSORLP00000003864        | 53 (8.85)                   |
| Takifugu rubripes ENSTRUP00000009667      | 55 (9.18)                   |
| Latimeria chalumnae ENSLACP00000004268    | 56 (9.35)                   |
| Bos taurus ENSBTAP000000021739            | 60 (10.02)                  |
| Oreochromis niloticus ENSONIP00000010373  | 62 (10.35)                  |
| Chrysemys picta 530646579                 | 71 (11.85)                  |
| Ficedula albicollis ENSFALP00000009808    | 72 (12.02)                  |
| Erinaceus europaeus ENSEEUP00000007413    | 72 (12.02)                  |
| Tupaia belangeri ENSTBEP00000013428       | 81 (13.52)                  |
| Tetraodon nigroviridis ENSTNIP00000017101 | 131 (21.87)                 |
| Tupaia belangeri ENSTBEP00000013236       | 148 (24.71)                 |
| Loxodonta africana ENSLAFP00000005536     | 249 (41.57)                 |
| Latimeria chalumnae ENSLACP00000000071    | 266 (44.41)                 |
| Gasterosteus aculeatus ENSGACP00000025600 | 366 (61.1)                  |
| Gadus morhua ENSGMOP00000019166           | 370 (61.77)                 |
| Gasterosteus aculeatus ENSGACP00000025601 | 432 (72.12)                 |
| Gadus morhua ENSGMOP00000019174           | 438 (73.12)                 |
