# Supplementary material for: Evolutionary history of phosphatidylinositol- 3-kinases: ancestral origin in eukaryotes and complex duplication patterns
Source: PubMed Central journal article supplement (PMC4617754; doi:10.1186/s12862-015-0498-7), 2015-10-19
Supplement: 12862_2015_498_MOESM7_ESM.pdf [file 12862_2015_498_MOESM7_ESM.pdf]

| Organism name and sequence ID               | Number of gaps (percentage) |
|---------------------------------------------|-----------------------------|
| Chrysemys picta 530644153                   | 0 (0.0)                     |
| Danio rerio ENSDARP00000120821              | 0 (0.0)                     |
| Latimeria chalumnae ENSLACP00000019372      | 0 (0.0)                     |
| Anas platyrhynchos ENSAPLP00000010610       | 0 (0.0)                     |
| Meleagris gallopavo ENSMGAP00000006951      | 0 (0.0)                     |
| Gallus gallus ENSGALP00000009863            | 0 (0.0)                     |
| Taeniopygia guttata ENSTGUP00000008892      | 0 (0.0)                     |
| Ficedula albicollis ENSFALP00000000804      | 0 (0.0)                     |
| Pelodiscus sinensis ENSPSIP00000013783      | 0 (0.0)                     |
| Anolis carolinensis ENSACAP00000000044      | 0 (0.0)                     |
| Mus musculus ENSMUSP00000126092             | 0 (0.0)                     |
| Pteropus vampyrus ENSPVAP00000012080        | 0 (0.0)                     |
| Homo sapiens ENSP00000265970                | 0 (0.0)                     |
| Canis lupus ENSCAFP00000036143              | 0 (0.0)                     |
| Loxodonta africana ENSLAFP00000003094       | 0 (0.0)                     |
| Monodelphis domestica ENSMODP00000034801    | 0 (0.0)                     |
| Ornithorhynchus anatinus ENSOANP00000012246 | 0 (0.0)                     |
| Callorhynchus milii 632941134               | 1 (0.09)                    |
| Chrysemys picta 530639296                   | 1 (0.09)                    |
| Lepisosteus oculatus ENSLOCP00000003495     | 1 (0.09)                    |
| Xenopus tropicalis ENSXETP00000034942       | 1 (0.09)                    |
| Pteropus vampyrus ENSPVAP00000006751        | 1 (0.09)                    |
| Homo sapiens ENSP00000356155                | 1 (0.09)                    |
| Otolemur garnettii ENSOGAP00000010659       | 1 (0.09)                    |
| Mus musculus ENSMUSP00000076911             | 1 (0.09)                    |
| Anolis carolinensis ENSACAP00000007419      | 1 (0.09)                    |
| Meleagris gallopavo ENSMGAP00000002505      | 1 (0.09)                    |
| Gallus gallus ENSGALP00000000882            | 1 (0.09)                    |
| Monodelphis domestica ENSMODP00000001932    | 1 (0.09)                    |
| Xiphophorus maculatus ENSXMAP00000012426    | 2 (0.18)                    |
| Oreochromis niloticus ENSONIP00000019580    | 2 (0.18)                    |
| Bos taurus ENSBTAP00000017388               | 2 (0.18)                    |
| Loxodonta africana ENSLAFP00000014283       | 2 (0.18)                    |
| Canis lupus ENSCAFP00000014201              | 2 (0.18)                    |
| Astyanax mexicanus ENSAMXP00000025863       | 3 (0.27)                    |
| Gadus morhua ENSGMOP00000011250             | 3 (0.27)                    |
| Takifugu rubripes ENSTRUP00000038296        | 4 (0.36)                    |
| Tetraodon nigroviridis ENSTNIP00000005672   | 4 (0.36)                    |
| Gasterosteus aculeatus ENSGACP00000008939   | 4 (0.36)                    |
| Latimeria chalumnae ENSLACP00000019798      | 4 (0.36)                    |
| Oryzias latipes ENSORLP00000013515          | 7 (0.63)                    |
| Erinaceus europaeus ENSEEUP00000006595      | 7 (0.63)                    |
| Xiphophorus maculatus ENSXMAP00000012596    | 9 (0.81)                    |
| Apis mellifera 571502742                    | 10 (0.9)                    |
| Lepisosteus oculatus ENSLOCP00000014902     | 10 (0.9)                    |
| Danio rerio ENSDARP00000110942              | 10 (0.9)                    |
| Astyanax mexicanus ENSAMXP00000010380       | 12 (1.08)                   |
| Oreochromis niloticus ENSONIP00000000365    | 14 (1.26)                   |
| Drosophila melanogaster FBpp0075818         | 14 (1.26)                   |
| Ficedula albicollis ENSFALP00000000443      | 15 (1.35)                   |
| Tupaia belangeri ENSTBEP00000006933         | 19 (1.71)                   |
| Callorhynchus milii 632963288               | 27 (2.43)                   |
| Gallus gallus ENSGALP000000021380           | 37 (3.32)                   |
| Mus musculus AAI50814                       | 37 (3.32)                   |

| Organism name and sequence ID             | Number of gaps (percentage) |
|-------------------------------------------|-----------------------------|
| Loxodonta africana ENSLAFP000000011952    | 37 (3.32)                   |
| Canis lupus ENSCAFP00000018530            | 37 (3.32)                   |
| Bos taurus ENSBTAP000000040697            | 38 (3.41)                   |
| Caenorhabditis elegans F39B1.1            | 39 (3.5)                    |
| Amphimedon queenslandica 340378016        | 44 (3.95)                   |
| Echinococcus granulosus 556520602         | 49 (4.4)                    |
| Erinaceus europaeus ENSEEUP00000013771    | 56 (5.03)                   |
| Pelodiscus sinensis XP006133177           | 59 (5.3)                    |
| Nematostella vectensis 156225157          | 60 (5.39)                   |
| Otolemur garnettii ENSOGAP00000001905     | 65 (5.84)                   |
| Oreochromis niloticus ENSONIP00000010680  | 68 (6.11)                   |
| Monosiga brevicollis 167533638            | 70 (6.29)                   |
| Clonorchis sinensis 358342191             | 73 (6.56)                   |
| Homo sapiens ENSP00000266497              | 75 (6.74)                   |
| Otolemur garnettii ENSOGAP00000002350     | 77 (6.92)                   |
| Schistosoma mansoni 353229343             | 78 (7.01)                   |
| Erinaceus europaeus ENSEEUP00000009401    | 78 (7.01)                   |
| Aplysia californica 524911800             | 78 (7.01)                   |
| Branchiostoma floridae 260790325          | 79 (7.1)                    |
| Pteropus vampyrus ENSPVAP00000000598      | 79 (7.1)                    |
| Latimeria chalumnae ENSLACP00000004519    | 82 (7.37)                   |
| Salpingoeca rosetta 326432665             | 85 (7.64)                   |
| Tupaia belangeri ENSTBEP00000003810       | 86 (7.73)                   |
| Tupaia belangeri ENSTBEP00000011511       | 86 (7.73)                   |
| Xiphophorus maculatus ENSXMAP00000007238  | 89 (8.0)                    |
| Chrysemys picta 530644775                 | 91 (8.18)                   |
| Anas platyrhynchos ENSAPLP00000009675     | 91 (8.18)                   |
| Takifugu rubripes ENSTRUP000000043606     | 96 (8.63)                   |
| Capsaspora owczarzakii 470291293          | 103 (9.25)                  |
| Tetraodon nigroviridis ENSTNIP00000008764 | 109 (9.79)                  |
| Ornithorhynchus anatinus XP001506878      | 116 (10.42)                 |
| Taeniopygia guttata ENSTGUP00000012743    | 129 (11.59)                 |
| Meleagris gallopavo ENSMGAP00000014352    | 141 (12.67)                 |
| Ciona intestinalis ENSCINP00000032884     | 169 (15.18)                 |
| Pelodiscus sinensis ENSPSIP00000002245    | 253 (22.73)                 |
| Crassostrea gigas 405975165               | 268 (24.08)                 |
| Petromyzon marinus ENSPMAT00000006926     | 303 (27.22)                 |
| Capitella teleta 443696965                | 379 (34.05)                 |
| Lottia gigantea 556098278                 | 452 (40.61)                 |
| Hydra vulgaris 449666338                  | 471 (42.32)                 |
| Saccoglossus kowalevskii 585646586        | 496 (44.56)                 |
| Crassostrea gigas 405976593               | 556 (49.96)                 |
| Petromyzon marinus ENSPMAT00000010071     | 695 (62.44)                 |
| Saccoglossus kowalevskii 585718267        | 716 (64.33)                 |
| Bos taurus ENSBTAP000000043907            | 752 (67.57)                 |
| Tetraodon nigroviridis ENSTNIP00000019124 | 827 (74.3)                  |
| Helobdella robusta 555694902              | 829 (74.48)                 |
| Gasterosteus aculeatus ENSGACP00000004463 | 905 (81.31)                 |
| Petromyzon marinus ENSPMAT00000007051     | 907 (81.49)                 |
| Gadus morhua ENSGMOP00000012312           | 914 (82.12)                 |
| Gadus morhua ENSGMOP00000005503           | 948 (85.18)                 |
| Gasterosteus aculeatus ENSGACP00000013210 | 948 (85.18)                 |
| Gasterosteus aculeatus ENSGACP00000004467 | 969 (87.06)                 |
| Gadus morhua ENSGMOP00000012319           | 969 (87.06)                 |
