# Supplementary material for: Evolutionary history of phosphatidylinositol- 3-kinases: ancestral origin in eukaryotes and complex duplication patterns
Source: PubMed Central journal article supplement (PMC4617754; doi:10.1186/s12862-015-0498-7), 2015-10-19
Supplement: 12862_2015_498_MOESM8_ESM.pdf [file 12862_2015_498_MOESM8_ESM.pdf]

| Organism name and sequence ID             | Number of gaps (percentage) |
|-------------------------------------------|-----------------------------|
| Nematostella vectensis 156221153          | 0 (0.0)                     |
| Capitella teleta 443734586                | 1 (0.12)                    |
| Callorhinchus milii 632934759             | 2 (0.24)                    |
| Lepisosteus oculatus ENSLOCP00000005286   | 2 (0.24)                    |
| Xiphophorus maculatus ENSXMAP00000006655  | 2 (0.24)                    |
| Oreochromis niloticus ENSONIP00000009986  | 2 (0.24)                    |
| Takifugu rubripes ENSTRUP00000017655      | 2 (0.24)                    |
| Homo sapiens ENSP00000418143              | 3 (0.36)                    |
| Loxodonta africana ENSLAFP00000013155     | 3 (0.36)                    |
| Mus musculus ENSMUSP00000035037           | 3 (0.36)                    |
| Erinaceus europaeus ENSEEUP00000007636    | 3 (0.36)                    |
| Pteropus vampyrus ENSVPAP00000005473      | 3 (0.36)                    |
| Bos taurus ENSBTAP00000009083             | 3 (0.36)                    |
| Canis lupus ENSCAFP00000011245            | 3 (0.36)                    |
| Anolis carolinensis ENSACAP00000003172    | 3 (0.36)                    |
| Pelodiscus sinensis ENSPSIP00000002511    | 3 (0.36)                    |
| Ficedula albicollis ENSFALP00000004251    | 3 (0.36)                    |
| Gallus gallus ENSGALP00000008740          | 3 (0.36)                    |
| Meleagris gallopavo ENSMGAP00000004152    | 3 (0.36)                    |
| Xenopus tropicalis ENSXETP000000056285    | 3 (0.36)                    |
| Latimeria chalumnae ENSLACP00000014968    | 3 (0.36)                    |
| Gadus morhua ENSGMOP00000014980           | 3 (0.36)                    |
| Oryzias latipes ENSORLP00000019450        | 3 (0.36)                    |
| Drosophila melanogaster FBpp0083348       | 3 (0.36)                    |
| Branchiostoma floridae 260815076          | 4 (0.48)                    |
| Taeniopygia guttata ENSTGUP00000005489    | 4 (0.48)                    |
| Danio rerio ENSDARP00000102724            | 4 (0.48)                    |
| Tetraodon nigroviridis ENSTNIP00000017338 | 4 (0.48)                    |
| Lepisosteus oculatus ENSLOCP00000001301   | 5 (0.6)                     |
| Gasterosteus aculeatus ENSGACP00000021206 | 5 (0.6)                     |
| Takifugu rubripes ENSTRUP00000016050      | 5 (0.6)                     |
| Tetraodon nigroviridis ENSTNIP00000010637 | 5 (0.6)                     |
| Oryzias latipes ENSORLP00000011212        | 5 (0.6)                     |
| Oreochromis niloticus ENSONIP00000013444  | 5 (0.6)                     |
| Xiphophorus maculatus ENSXMAP00000004675  | 5 (0.6)                     |
| Gadus morhua ENSGMOP00000003184           | 5 (0.6)                     |
| Anolis carolinensis ENSACAP00000004867    | 5 (0.6)                     |
| Gallus gallus ENSGALP00000014504          | 5 (0.6)                     |
| Meleagris gallopavo ENSMGAP00000010212    | 5 (0.6)                     |
| Anas platyrhynchos ENSAPLP00000012778     | 5 (0.6)                     |
| Ficedula albicollis ENSFALP00000008750    | 5 (0.6)                     |
| Taeniopygia guttata ENSTGUP00000011093    | 5 (0.6)                     |
| Monodelphis domestica ENSMODP000000026633 | 5 (0.6)                     |
| Canis lupus ENSCAFP00000016537            | 5 (0.6)                     |
| Bos taurus ENSBTAP00000012168             | 5 (0.6)                     |
| Otolemur garnettii ENSOGAP00000005899     | 5 (0.6)                     |
| Loxodonta africana ENSLAFP00000002561     | 5 (0.6)                     |
| Homo sapiens ENSP00000263967              | 5 (0.6)                     |
| Danio rerio ENSDARP00000124781            | 5 (0.6)                     |
| Astyanax mexicanus ENSAMXP00000020452     | 5 (0.6)                     |
| Gadus morhua ENSGMOP00000011408           | 5 (0.6)                     |
| Oreochromis niloticus ENSONIP00000022585  | 5 (0.6)                     |
| Xiphophorus maculatus ENSXMAP00000008625  | 5 (0.6)                     |
| Gasterosteus aculeatus ENSGACP00000001555 | 5 (0.6)                     |
| Callorhinchus milii 632968054             | 5 (0.6)                     |
| Callorhinchus milii 632934984             | 5 (0.6)                     |
| Chrysemys picta 530584406                 | 5 (0.6)                     |
| Monodelphis domestica ENSMODP000000023181 | 5 (0.6)                     |
| Otolemur garnettii ENSOGAP00000013693     | 5 (0.6)                     |
| Canis lupus ENSCAFP000000029210           | 5 (0.6)                     |
| Mus musculus ENSMUSP00000036434           | 5 (0.6)                     |
| Anas platyrhynchos ENSAPLP00000007963     | 5 (0.6)                     |
| Ficedula albicollis ENSFALP00000007638    | 5 (0.6)                     |
| Gallus gallus ENSGALP00000004061          | 5 (0.6)                     |
| Meleagris gallopavo ENSMGAP00000003869    | 5 (0.6)                     |
| Anolis carolinensis ENSACAP00000013119    | 5 (0.6)                     |
| Pelodiscus sinensis ENSPSIP00000004971    | 5 (0.6)                     |
| Gadus morhua ENSGMOP00000000741           | 5 (0.6)                     |
| Xiphophorus maculatus ENSXMAP00000011635  | 5 (0.6)                     |
| Takifugu rubripes ENSTRUP00000025672      | 5 (0.6)                     |
| Oryzias latipes ENSORLP00000006834        | 5 (0.6)                     |
| Oreochromis niloticus ENSONIP00000002983  | 5 (0.6)                     |
| Mus musculus ENSMUSP00000103878           | 5 (0.6)                     |
| Latimeria chalumnae ENSLACP00000017606    | 5 (0.6)                     |
| Gasterosteus aculeatus ENSGACP00000008159 | 5 (0.6)                     |
| Oreochromis niloticus ENSONIP00000010535  | 5 (0.6)                     |
| Tetraodon nigroviridis ENSTNIP00000009567 | 5 (0.6)                     |
| Takifugu rubripes ENSTRUP00000009530      | 5 (0.6)                     |
| Oryzias latipes ENSORLP00000014606        | 5 (0.6)                     |
| Xiphophorus maculatus ENSXMAP00000000601  | 5 (0.6)                     |
| Lottia gigantea 556102838                 | 6 (0.72)                    |
| Crassostrea gigas 405975190               | 6 (0.72)                    |
| Tetraodon nigroviridis ENSTNIP00000018220 | 6 (0.72)                    |
| Gasterosteus aculeatus ENSGACP00000009701 | 6 (0.72)                    |
| Xenopus tropicalis ENSXETP00000015756     | 7 (0.85)                    |
| Anas platyrhynchos ENSAPLP00000003138     | 7 (0.85)                    |
| Gasterosteus aculeatus ENSGACP00000007464 | 7 (0.85)                    |
| Danio rerio ENSDARP00000017757            | 7 (0.85)                    |
| Lepisosteus oculatus ENSLOCP00000008374   | 7 (0.85)                    |
| Capitella teleta 443701283                | 8 (0.97)                    |
| Tupaia belangeri ENSTBEP00000010880       | 9 (1.09)                    |
| Tetraodon nigroviridis ENSTNIP00000005428 | 9 (1.09)                    |
| Takifugu rubripes ENSTRUP00000013971      | 10 (1.21)                   |

| Organism name and sequence ID                | Number of gaps (percentage) |
|----------------------------------------------|-----------------------------|
| Ciona savignyi ENSCSAVP00000004359           | 11 (1.33)                   |
| Caenorhabditis elegans B0334.8               | 12 (1.45)                   |
| Schistosoma mansoni 353228720                | 13 (1.57)                   |
| Trichoplax adhaerens 196007024               | 13 (1.57)                   |
| Clonorchis sinensis 358334260                | 13 (1.57)                   |
| Xenopus tropicalis ENSXETP00000013019        | 16 (1.93)                   |
| Oryzias latipes ENSORLP00000011853           | 18 (2.17)                   |
| Xiphophorus maculatus ENSXMAP00000008835     | 18 (2.17)                   |
| Latimeria chalumnae ENSLACP00000007893       | 18 (2.17)                   |
| Gallus gallus ENSGALP00000013101             | 18 (2.17)                   |
| Meleagris gallopavo ENSMGAP00000014459       | 18 (2.17)                   |
| Taeniopygia guttata ENSTGUP00000003158       | 18 (2.17)                   |
| Anas platyrhynchos ENSAPLP00000006296        | 18 (2.17)                   |
| Pelodiscus sinensis ENSPSIP00000006579       | 18 (2.17)                   |
| Branchiostoma floridae 260831840             | 18 (2.17)                   |
| Lepisosteus oculatus ENSLOCP00000019486      | 19 (2.29)                   |
| Oreochromis niloticus ENSONIP00000014923     | 19 (2.29)                   |
| Helobdella robusta 555689542                 | 19 (2.29)                   |
| Xiphophorus maculatus ENSXMAP00000016592     | 19 (2.29)                   |
| Apis mellifera 571563007                     | 19 (2.29)                   |
| Ciona intestinalis ENSCINP00000010684        | 19 (2.29)                   |
| Gasterosteus aculeatus ENSGACP00000025368    | 20 (2.42)                   |
| Tetraodon nigroviridis ENSTNIP00000009686    | 20 (2.42)                   |
| Loxodonta africana ENSLAFP00000003840        | 20 (2.42)                   |
| Otolemur garnettii ENSOGAP00000011733        | 20 (2.42)                   |
| Homo sapiens ENSP00000392258                 | 20 (2.42)                   |
| Canis lupus ENSCAFP00000005911               | 20 (2.42)                   |
| Mus musculus ENSMUSP000000082596             | 20 (2.42)                   |
| Anolis carolinensis ENSACAP00000014629       | 20 (2.42)                   |
| Callorhinchus milii 632943520                | 20 (2.42)                   |
| Amphimedon queenslandica 340370959           | 20 (2.42)                   |
| Tupaia belangeri ENSTBEP00000008487          | 21 (2.54)                   |
| Callorhinchus milii 632946473                | 21 (2.54)                   |
| Capsaspora owczaraki 470309276               | 21 (2.54)                   |
| Astyanax mexicanus ENSAMXP00000004300        | 22 (2.66)                   |
| Danio rerio ENSDARP00000002818               | 22 (2.66)                   |
| Monodelphis domestica ENSMODP000000020477    | 22 (2.66)                   |
| Oreochromis niloticus ENSONIP00000002013     | 22 (2.66)                   |
| Helobdella robusta 555699397                 | 22 (2.66)                   |
| Ciona intestinalis ENSCINP00000014231        | 23 (2.78)                   |
| Latimeria chalumnae ENSLACP00000012857       | 23 (2.78)                   |
| Homo sapiens ENSP00000446444                 | 23 (2.78)                   |
| Bos taurus ENSBTAP000000025274               | 23 (2.78)                   |
| Pteropus vampyrus ENSVPAP00000004422         | 24 (2.9)                    |
| Amphimedon queenslandica 340370156           | 25 (3.02)                   |
| Ornithorhynchus anatinus ENSOANP00000012983  | 25 (3.02)                   |
| Gadus morhua ENSGMOP00000009961              | 26 (3.14)                   |
| Lepisosteus oculatus ENSLOCP00000016225      | 26 (3.14)                   |
| Capsaspora owczaraki 470303443               | 26 (3.14)                   |
| Monosiga brevicollis 167521039               | 26 (3.14)                   |
| Petromyzon marinus ENSPMAT00000002453        | 31 (3.74)                   |
| Echinococcus granulosus 576697681            | 31 (3.74)                   |
| Lottia gigantea 556100131                    | 33 (3.99)                   |
| Danio rerio ENSDARP000000054650              | 34 (4.11)                   |
| Oryzias latipes ENSORLP00000002186           | 34 (4.11)                   |
| Ciona savignyi ENSCSAVP00000000553           | 36 (4.35)                   |
| Pteropus vampyrus ENSVPAP00000013295         | 37 (4.47)                   |
| Latimeria chalumnae ENSLACP00000010097       | 37 (4.47)                   |
| Ornithorhynchus anatinus ENSOANP000000023160 | 41 (4.95)                   |
| Pelodiscus sinensis ENSPSIP00000016189       | 43 (5.19)                   |
| Loxodonta africana XP003413227               | 46 (5.56)                   |
| Gasterosteus aculeatus ENSGACP00000005515    | 53 (6.4)                    |
| Takifugu rubripes ENSTRUP00000008194         | 54 (6.52)                   |
| Tetraodon nigroviridis ENSTNIP00000003526    | 55 (6.64)                   |
| Amphimedon queenslandica 340369052           | 56 (6.76)                   |
| Gadus morhua ENSGMOP00000000052              | 58 (7.0)                    |
| Aplysia californica 524908046                | 65 (7.85)                   |
| Ciona savignyi ENSCSAVP000000007755          | 68 (8.21)                   |
| Erinaceus europaeus ENSEEUP00000013678       | 71 (8.57)                   |
| Takifugu rubripes XP003973030                | 73 (8.82)                   |
| Tupaia belangeri ENSTBEP00000005289          | 78 (9.42)                   |
| Salpingoeca rosetta 326430078                | 79 (9.54)                   |
| Aplysia californica 524899805                | 92 (11.11)                  |
| Tupaia belangeri ENSTBEP00000002551          | 93 (11.23)                  |
| Pteropus vampyrus ENSVPAP00000002313         | 98 (11.84)                  |
| Erinaceus europaeus ENSEEUP00000006927       | 104 (12.56)                 |
| Crassostrea gigas 405975626                  | 109 (13.16)                 |
| Ficedula albicollis ENSFALP00000010709       | 129 (15.58)                 |
| Tetraodon nigroviridis ENSTNIP00000006420    | 148 (17.87)                 |
| Saccoglossus kowalevskii 585654121           | 150 (18.12)                 |
| Otolemur garnettii ENSOGAP00000003608        | 152 (18.36)                 |
| Salpingoeca rosetta 326435786                | 159 (19.2)                  |
| Monodelphis domestica ENSMODP00000003651     | 171 (20.65)                 |
| Bos taurus ENSBTAP000000027780               | 219 (26.45)                 |
| Hydra vulgaris 449686903                     | 421 (50.85)                 |
| Hydra vulgaris 449686315                     | 437 (52.78)                 |
| Petromyzon marinus ENSPMAT00000002863        | 438 (52.9)                  |
| Saccoglossus kowalevskii 585661864           | 459 (55.43)                 |
| Amphimedon queenslandica 340383255           | 486 (58.7)                  |
| Petromyzon marinus ENSPMAT00000000829        | 573 (69.2)                  |
| Monosiga brevicollis 167520402               | 599 (72.34)                 |
| Saccoglossus kowalevskii 585706768           | 599 (72.34)                 |
