# Supplementary material for: Evolutionary history of phosphatidylinositol- 3-kinases: ancestral origin in eukaryotes and complex duplication patterns
Source: PubMed Central journal article supplement (PMC4617754; doi:10.1186/s12862-015-0498-7), 2015-10-19
Supplement: 12862_2015_498_MOESM10_ESM.pdf [file 12862_2015_498_MOESM10_ESM.pdf]

# PI4K root

PI4K- $\alpha$

PI4K- $\beta$

III

II

I

IA

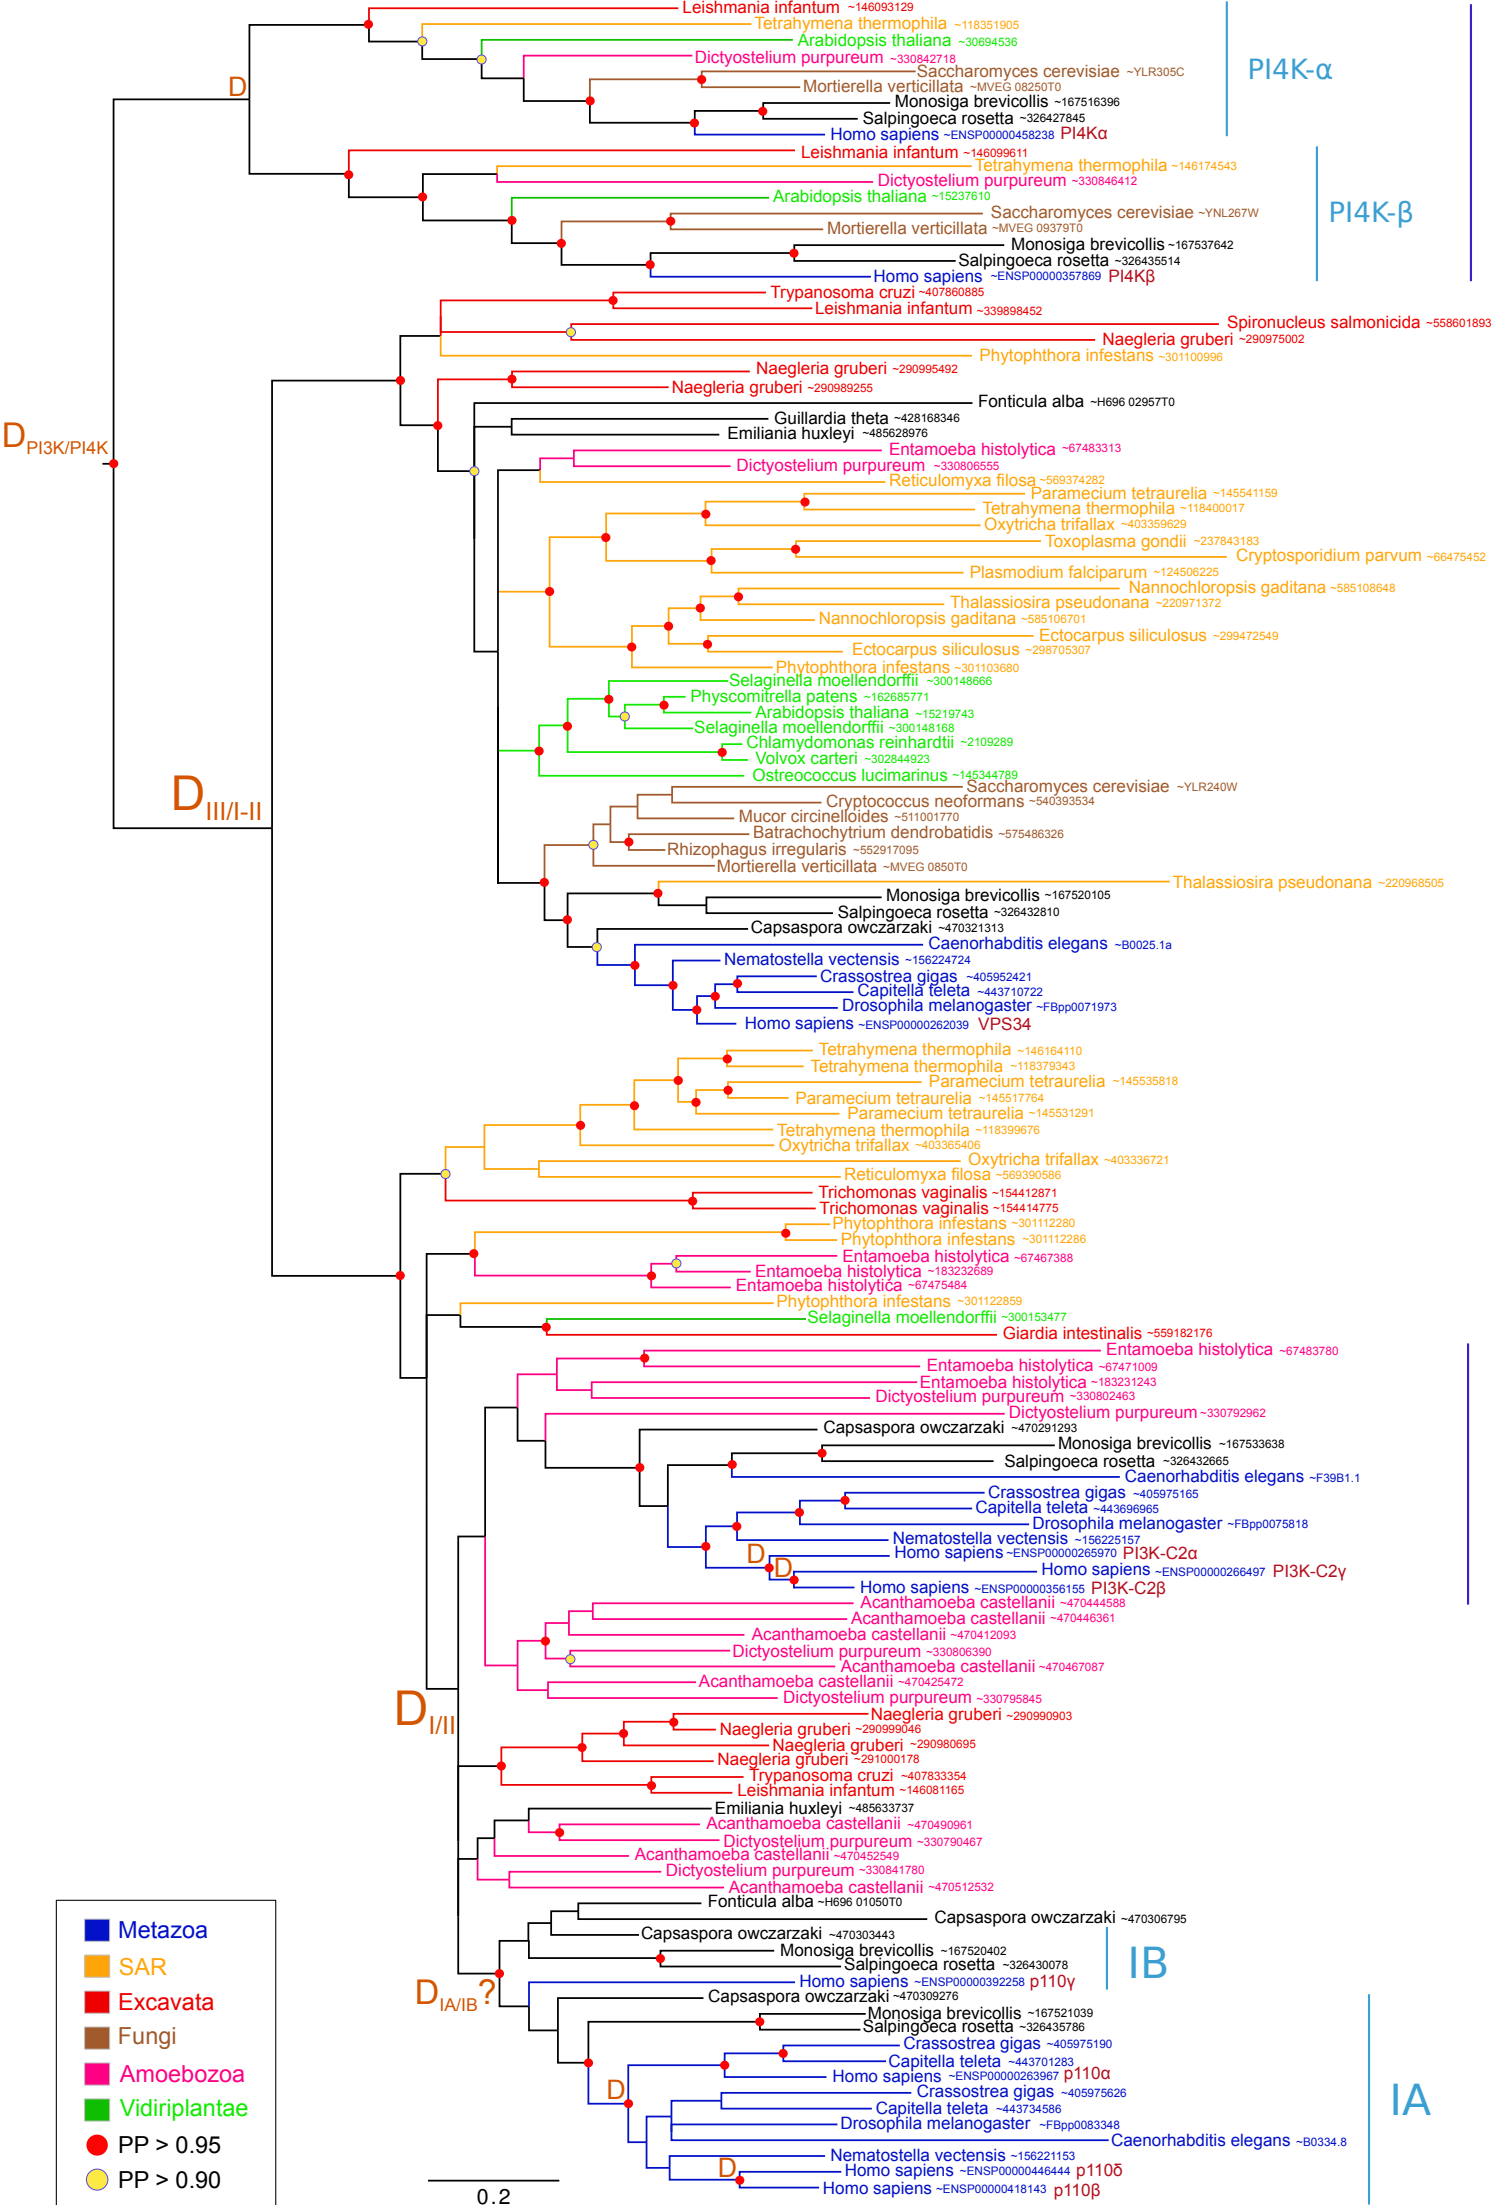

- Metazoa
- SAR
- Excavata
- Fungi
- Amoebozoa
- Vidiriplantae
- PP > 0.95
- PP > 0.90

0.2
